# Supplementary material for: Effects of Commercial Apple Varieties on Human Gut Microbiota Composition and Metabolic Output Using an In Vitro Colonic Model
Source: MDPI journal article supplement (doi:10.3390/nu9060533), 2017-05-24
Supplement: s1 [file s1]

## Supplementary File

**Table S1.** Composition analysis of Renetta Canada, Golden Delicious and Pink Lady. \*

| Components                      | Renetta Canada | Golden Delicious | Pink Lady |
|---------------------------------|----------------|------------------|-----------|
| Energy (KJ)/100g                | 274            | 297              | 267       |
| Energy (Kcal)/100g              | 65             | 70               | 63        |
| Fat (Weibull Stoldt) (g/100g)   | 0.2            | 0.3              | 0.2       |
| Carbohydrate total (g/100g)     | 16.8           | 17.8             | 16.2      |
| Total sugar (g/100g)            | 13.3           | 12.9             | 13.0      |
| Glucose (g/100g)                | 1.5            | 0.8              | 1.5       |
| Fructose (g/100g)               | 6.4            | 5.6              | 6.4       |
| Sucrose (g/100g)                | 5.4            | 6.5              | 5.1       |
| Protein (Kjeldahl) (g/100g)     | 0.3            | 0.3              | 0.2       |
| Moisture (Vac at 70°C) (g/100g) | 82.5           | 81.3             | 83.0      |
| <i>Organic acids</i>            |                |                  |           |
| Ascorbic acid                   | 0.6            | 0.4              | 0.9       |
| Malic acid                      | 902            | 478              | 729       |

\* For each apple variety a mixture of three fresh whole apples was analyzed.

A

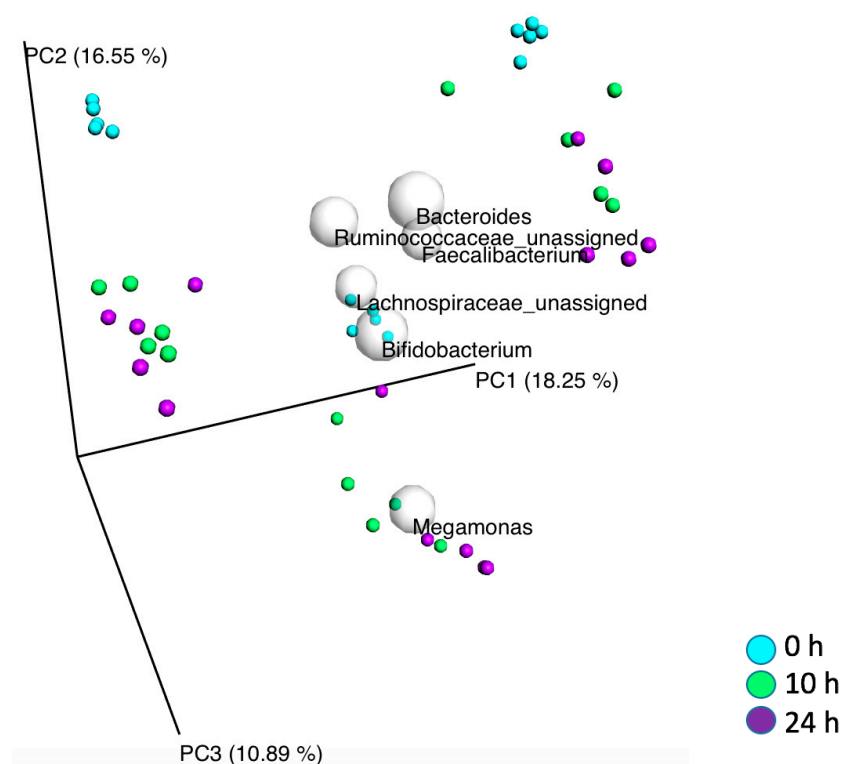

B

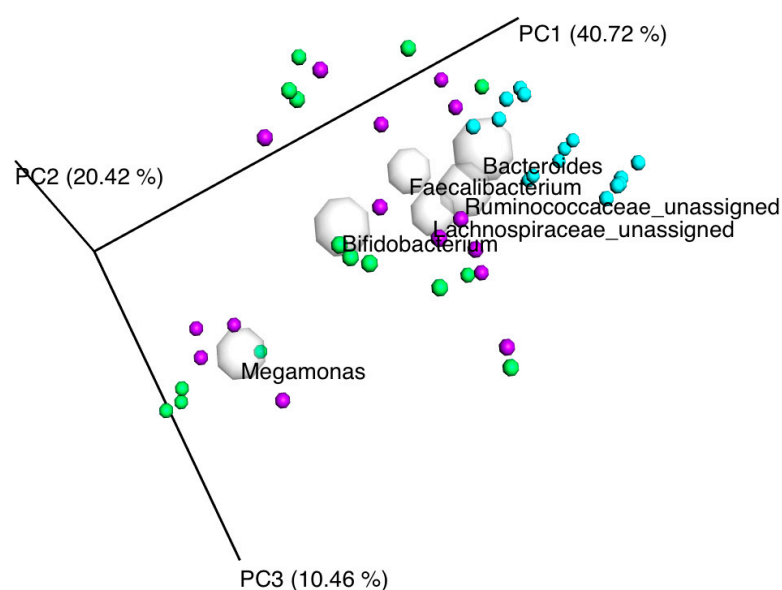

**Figure S1.** Principal coordinate analysis (PCoA) plots of 16S rRNA gene profiles based on (A) unweighted (qualitative) and (B) weighted (quantitative) phylogenetic UniFrac distance matrices calculated from a rarefied OTU table (11708 reads per sample) showing a clustering between time (ANOSIM and ADONIS test,  $P=0.01$  and  $P=0.001$ , respectively) for the whole data set (24-hour *in vitro* batch culture fermentations inoculated with human feces ( $n=3$  healthy donors) and administrated with inulin, cellulose, Renetta Canada, Golden Delicious and Pink Lady as the substrates/treatments). Samples were analyzed at 0, 10 and 24 h. Each color represents a different time point. The gray spherical coordinates indicate taxonomic vectors of the 6 most prevalent taxa at the genus level. The size of each sphere is proportional to the mean relative abundance and approximates the causing variance throughout the plotted samples.

A

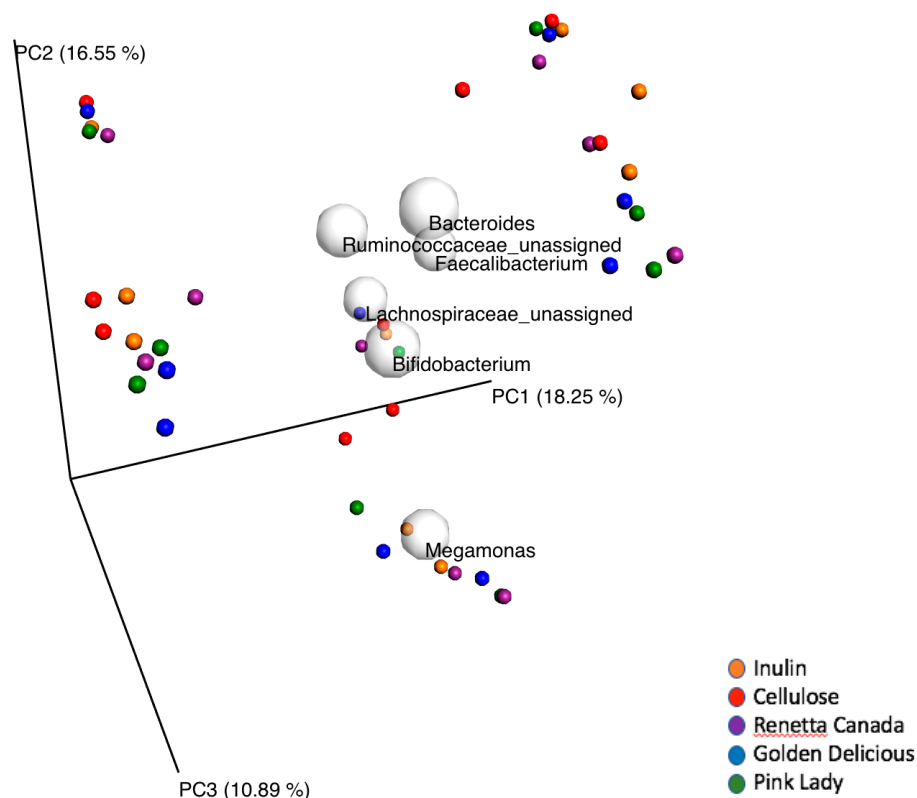

B

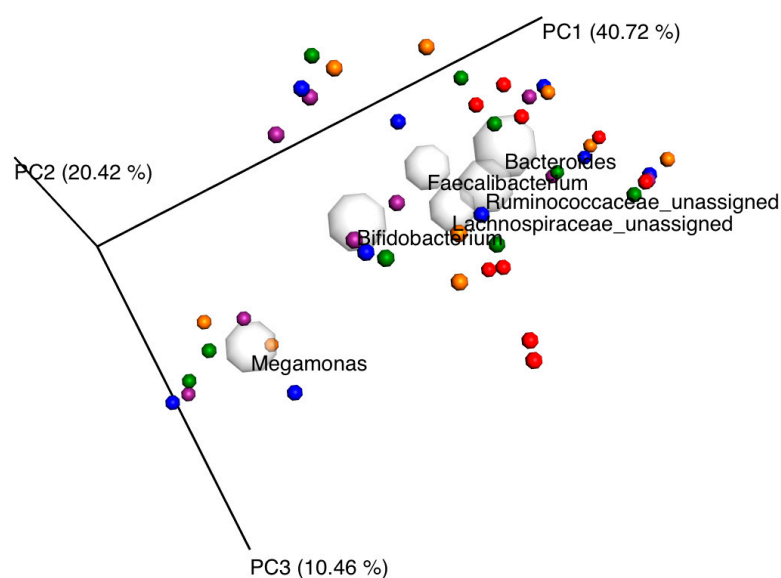

**Figure S2.** Principal coordinate analysis (PCoA) plots of 16S rRNA gene profiles based on (A) unweighted (qualitative) and (B) weighted (quantitative) phylogenetic UniFrac distance matrices calculated from a rarefied OTU table (11708 reads per sample) and colored according to treatment (24-hour *in vitro* batch culture fermentations inoculated with human feces (n=3 healthy donors) and administrated with inulin, cellulose, Renetta Canada, Golden Delicious and Pink Lady as the substrates/treatments). Samples were analyzed at 0, 10 and 24 h. Each color represents a different treatment. The gray spherical coordinates indicate taxonomic vectors of the 6 most prevalent taxa at the genus level. The size of each sphere is proportional to the mean relative abundance and approximates the causing variance throughout the plotted samples.

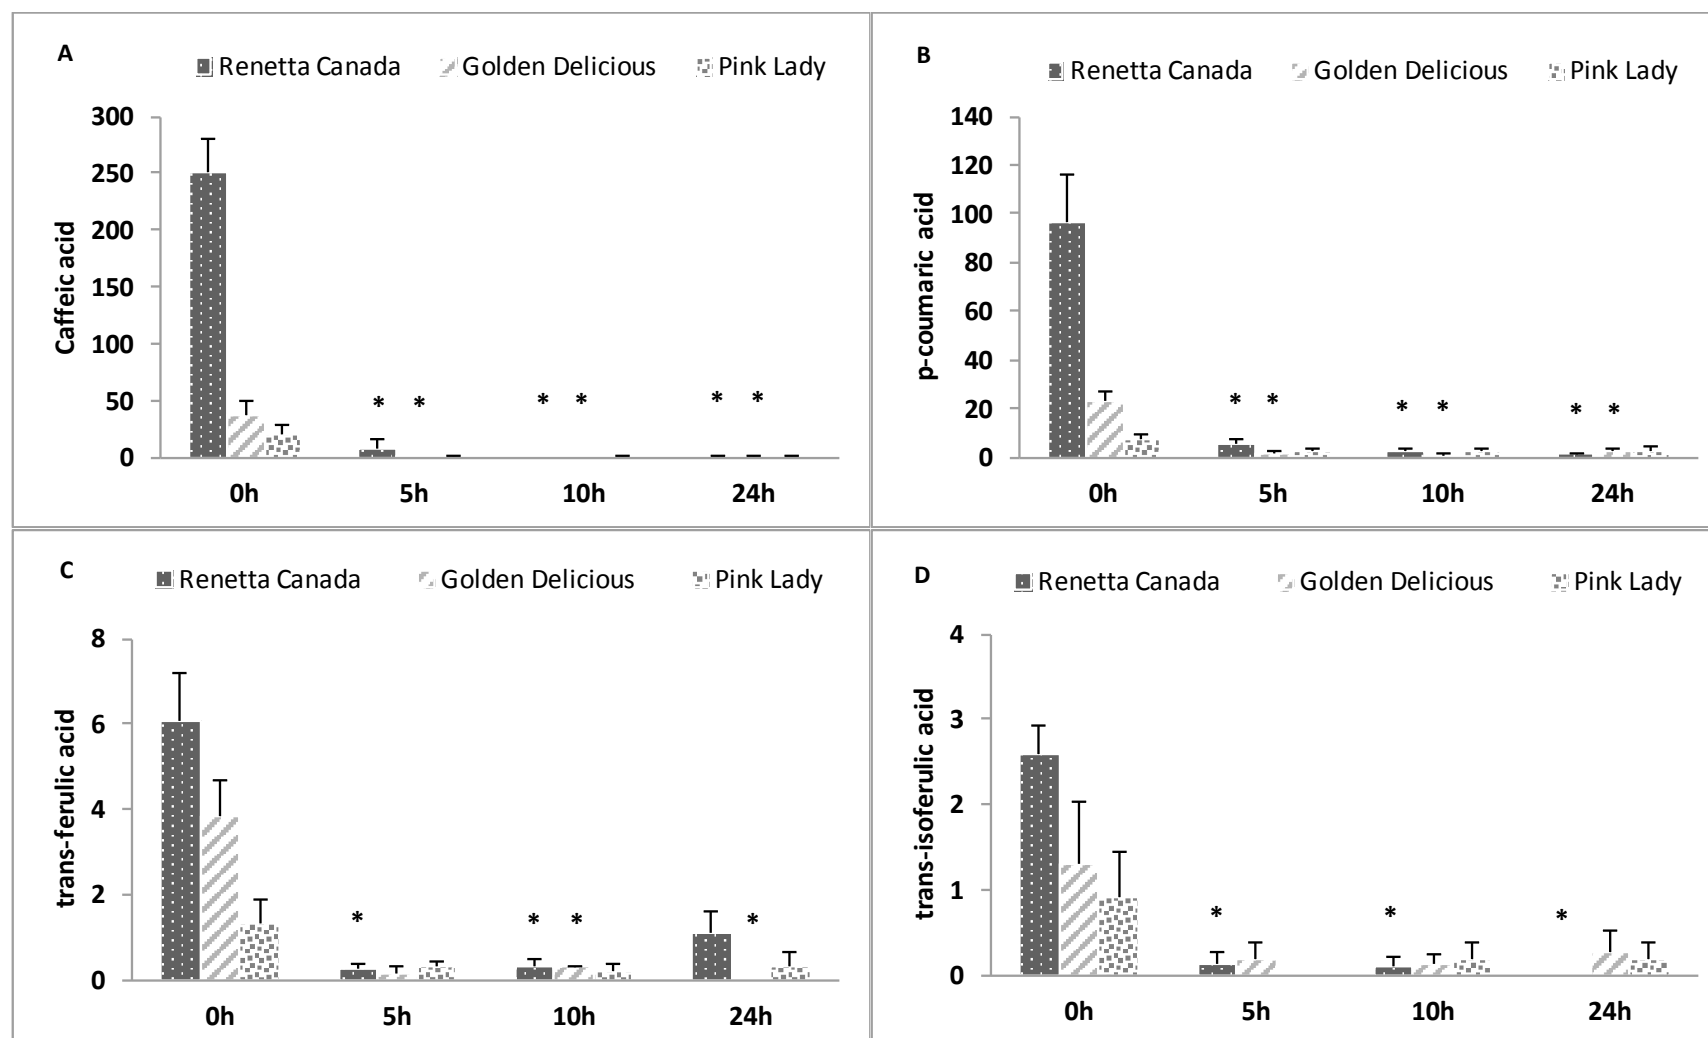

**Figure S3.** Changes in cinnamic acid derivatives (A, Caffeic acid; B, p-coumaric acid; C, t-ferulic acid and D, trans-isoferulic acid) throughout 24-hour *in vitro* batch culture fermentations inoculated with human feces (n=3 healthy donors) and administrated with Renetta Canada, Golden Delicious and Pink Lady as the substrates (treatments). Samples were collected at 0, 5, 10 and 24 h. Results are expressed as ng/ml of batch culture medium and values are mean  $\pm$  SEM of the three fermentations. \* Significant differences ( $P < 0.05$ ) from the 0 h time point within the same treatment

**Table S2.** Changes in bacterial taxa throughout 24-hour *in vitro* batch culture fermentations inoculated with human feces (n=3 healthy donors) and administrated with inulin, cellulose, Renetta Canada, Golden Delicious and Pink Lady as the substrates.

| Bacterial Taxonomy                                       | Time Point | Inulin (%)   | <i>p</i> ( <i>p</i> -FDR) <sup>a</sup> | Cellulose (%) | <i>p</i> ( <i>p</i> -FDR) <sup>a</sup> | Renetta Canada (%) | <i>p</i> ( <i>p</i> -FDR) <sup>a</sup> | Golden Delicious (%) | <i>p</i> ( <i>p</i> -FDR) <sup>a</sup> | Pink Lady (%) | <i>p</i> ( <i>p</i> -FDR) <sup>a</sup> |
|----------------------------------------------------------|------------|--------------|----------------------------------------|---------------|----------------------------------------|--------------------|----------------------------------------|----------------------|----------------------------------------|---------------|----------------------------------------|
| p_Firmicutes<br>f_Lachnospiraceae<br>g_Blautia           | 0h         | 3.4 ± 1.1    | 0.880<br>(0.985)                       | 3.6 ± 1.1     | 0.090<br>(0.548)                       | 4.8 ± 0.43         | <b>0.022</b><br>(0.211)                | 4.2 ± 0.32           | 0.082<br>(0.423)                       | 4.9 ± 0.9     | <b>0.009</b><br>(0.121)                |
|                                                          | 10h        | 3.8 ± 0.9    |                                        | 2.5 ± 1.1     |                                        | 1.9 ± 1.2          |                                        | 2.4 ± 1.2            |                                        | 2.2 ± 1.1     |                                        |
|                                                          | 24h        | 3.3 ± 2      |                                        | 1.2 ± 0.37    |                                        | 1.5 ± 0.54*        |                                        | 1.8 ± 1.1            |                                        | 1.1 ± 0.4*    |                                        |
| p_Firmicutes;<br>f_Lachnospiraceae<br>g_Coproccoccus     | 0h         | 5.9 ± 1.6    | 0.820<br>(0.985)                       | 5.7 ± 0.87    | <b>0.001</b><br>(0.034)                | 5.6 ± 1.6          | 0.873<br>(0.985)                       | 5.2 ± 1.2            | 0.806<br>(0.985)                       | 5.9 ± 1.2     | 0.441<br>(0.951)                       |
|                                                          | 10h        | 5.5 ± 2      |                                        | 4.4 ± 0.89*   |                                        | 6 ± 2.3            |                                        | 5.6 ± 2.6            |                                        | 3.2 ± 1.2     |                                        |
|                                                          | 24h        | 4.3 ± 1.3    |                                        | 4 ± 0.91*     |                                        | 4.4 ± 1.6          |                                        | 7.3 ± 3.5            |                                        | 3.7 ± 1.3     |                                        |
| p_Firmicutes<br>f_Lachnospiraceae<br>g_Dorea             | 0h         | 0.87 ± 0.16  | 0.163<br>(0.683)                       | 0.93 ± 0.26   | <b>0.015</b><br>(0.201)                | 1.1 ± 0.22         | 0.068<br>(0.350)                       | 0.9 ± 0.18           | 0.410<br>(0.985)                       | 1.3 ± 0.4     | 0.128<br>(0.504)                       |
|                                                          | 10h        | 6.9 ± 3.6    |                                        | 4.8 ± 0.93*   |                                        | 3.5 ± 0.94         |                                        | 3.6 ± 1.9            |                                        | 4.3 ± 2.3     |                                        |
|                                                          | 24h        | 3.4 ± 1.5    |                                        | 5.6 ± 1.3     |                                        | 2.3 ± 0.11         |                                        | 2.7 ± 0.96           |                                        | 5.4 ± 0.39    |                                        |
| p_Firmicutes;<br>f_Lachnospiraceae<br>g_Roseburia        | 0h         | 0.38 ± 0.05  | <b>0.020</b><br>(0.268)                | 0.79 ± 0.30   | 0.084<br>(0.563)                       | 0.48 ± 0.11        | <b>0.026</b><br>(0.218)                | 0.53 ± 0.08          | 0.156<br>(0.615)                       | 0.47 ± 0.04   | <b>0.049</b><br>(0.298)                |
|                                                          | 10h        | 0.12 ± 0.06  |                                        | 0.06 ± 0.02   |                                        | 0.03 ± 0.01        |                                        | 0.03 ± 0.01          |                                        | 0.06 ± 0.02*  |                                        |
|                                                          | 24h        | 0.04 ± 0.01* |                                        | 0.08 ± 0.07   |                                        | 0.06 ± 0.04        |                                        | 0.25 ± 0.21          |                                        | 0.17 ± 0.13   |                                        |
| p_Firmicutes<br>f_Lachnospiraceae<br>g_unassigned        | 0h         | 5.6 ± 0.17   | 0.342<br>(0.979)                       | 6 ± 0.81      | 0.059<br>(0.494)                       | 6.1 ± 0.21         | <b>0.030</b><br>(0.223)                | 5.6 ± 0.35           | 0.162<br>(0.603)                       | 6.5 ± 0.76    | <b>0.003</b><br>(0.067)                |
|                                                          | 10h        | 4.3 ± 1.3    |                                        | 9.1 ± 0.94    |                                        | 2.6 ± 0.66         |                                        | 5 ± 2.1              |                                        | 2.9 ± 1.2     |                                        |
|                                                          | 24h        | 6.5 ± 0.8    |                                        | 10 ± 1.2      |                                        | 9.3 ± 1.9          |                                        | 10 ± 1.5             |                                        | 10.3 ± 1.3*   |                                        |
| p_Firmicutes;<br>f_Ruminococcaceae<br>g_Faecalibacterium | 0h         | 5.2 ± 1.6    | <b>0.035</b><br>(0.335)                | 5.5 ± 2       | 0.689<br>(0.985)                       | 5.8 ± 2.5          | <b>0.019</b><br>(0.255)                | 5 ± 1.7              | 0.755<br>(0.985)                       | 5.8 ± 2.7     | 0.386<br>(0.951)                       |
|                                                          | 10h        | 6.1 ± 2.6    |                                        | 4.5 ± 0.99    |                                        | 4.9 ± 2.9          |                                        | 5.1 ± 2.7            |                                        | 2.8 ± 0.93    |                                        |
|                                                          | 24h        | 17 ± 3.7     |                                        | 4.6 ± 2.2     |                                        | 16 ± 5.5           |                                        | 5.9 ± 1.9            |                                        | 5.4 ± 1.4     |                                        |
| p_Firmicutes;<br>f_Ruminococcaceae<br>g_Oscillospira     | 0h         | 0.9 ± 0.2    | 0.667<br>(0.985)                       | 0.91 ± 0.19   | <b>0.002</b><br>(0.054)                | 0.98 ± 0.31        | 0.218<br>(0.730)                       | 0.96 ± 0.29          | <b>0.040</b><br>(0.335)                | 0.94 ± 0.3    | <b>0.019</b><br>(0.182)                |
|                                                          | 10h        | 0.66 ± 0.10  |                                        | 1 ± 0.07      |                                        | 0.32 ± 0.03        |                                        | 0.30 ± 0.14          |                                        | 0.23 ± 0.07   |                                        |
|                                                          | 24h        | 1 ± 0.58     |                                        | 2.5 ± 0.11*   |                                        | 1 ± 0.49           |                                        | 1.1 ± 0.35           |                                        | 1.4 ± 0.28*   |                                        |

|                                                               |     |              |                         |             |                         |              |                         |              |                         |              |                         |
|---------------------------------------------------------------|-----|--------------|-------------------------|-------------|-------------------------|--------------|-------------------------|--------------|-------------------------|--------------|-------------------------|
| p_Firmicutes<br>f_Ruminococcaceae<br>g_Ruminococcus           | 0h  | 4 ± 0.96     | <b>0.015</b><br>(0.251) | 4.9 ± 1.4   | 0.100<br>(0.558)        | 4.7 ± 1.1    | <b>0.011</b><br>(0.246) | 4.3 ± 1      | <b>0.013</b><br>(0.290) | 4.5 ± 1.2    | <b>0.021</b><br>(0.176) |
|                                                               | 10h | 1.4 ± 0.35   |                         | 1.8 ± 0.49  |                         | 0.63 ± 0.43* |                         | 0.41 ± 0.18  |                         | 0.45 ± 0.17  |                         |
|                                                               | 24h | 0.74 ± 0.11  |                         | 1.2 ± 0.62  |                         | 0.39 ± 0.12  |                         | 0.34 ± 0.16  |                         | 0.22 ± 0.13  |                         |
| p_Firmicutes;<br>f_[Mogibacteriaceae]<br>g_unassigned         | 0h  | 0.31 ± 0.04  | <b>0.009</b><br>(0.201) | 0.29 ± 0.06 | 0.263<br>(0.985)        | 0.30 ± 0.06  | <b>0.022</b><br>(0.246) | 0.24 ± 0.08  | 0.122<br>(0.545)        | 0.29 ± 0.02  | <b>0.000</b><br>(0.007) |
|                                                               | 10h | 0.15 ± 0.01  |                         | 0.14 ± 0.00 |                         | 0.08 ± 0.02  |                         | 0.05 ± 0.01  |                         | 0.06 ± 0.01* |                         |
|                                                               | 24h | 0.06 ± 0.01* |                         | 0.16 ± 0.06 |                         | 0.08 ± 0.02  |                         | 0.08 ± 0.02  |                         | 0.07 ± 0.03* |                         |
| p_Firmicutes;<br>o_Clostridiales;<br>f_g_unclassified         | 0h  | 4.3 ± 0.73   | <b>0.021</b><br>(0.235) | 4.9 ± 0.69  | <b>0.043</b><br>(0.412) | 4.6 ± 0.61   | <b>0.001</b><br>(0.040) | 4.8 ± 0.78   | <b>0.002</b><br>(0.084) | 4.1 ± 0.63   | <b>0.004</b><br>(0.067) |
|                                                               | 10h | 1.8 ± 0.09   |                         | 2.8 ± 0.33* |                         | 0.82 ± 0.24* |                         | 0.76 ± 0.16* |                         | 0.81 ± 0.12* |                         |
|                                                               | 24h | 1.2 ± 0.27   |                         | 2.5 ± 0.58  |                         | 0.36 ± 0.05* |                         | 0.75 ± 0.19* |                         | 0.86 ± 0.19* |                         |
| p_Firmicutes;<br>o_Clostridiales;<br>Other;Other              | 0h  | 2.7 ± 0.18   | <b>0.001</b><br>(0.050) | 2.7 ± 0.21  | <b>0.007</b><br>(0.117) | 2.7 ± 0.44   | <b>0.002</b><br>(0.067) | 2.5 ± 0.25   | <b>0.001</b><br>(0.040) | 3.3 ± 0.78   | <b>0.045</b><br>(0.302) |
|                                                               | 10h | 0.68 ± 0.12* |                         | 1.4 ± 0.23* |                         | 0.47 ± 0.10* |                         | 0.33 ± 0.03* |                         | 0.59 ± 0.27  |                         |
|                                                               | 24h | 0.71 ± 0.29* |                         | 1.4 ± 0.41* |                         | 0.68 ± 0.19* |                         | 0.34 ± 0.05* |                         | 0.81 ± 0.65  |                         |
| p_Firmicutes;<br>f_Turicibacteraceae<br>g_Turicibacter        | 0h  | 0.04 ± 0.02  | 0.263<br>(0.979)        | 0.06 ± 0    | 0.366<br>(0.985)        | 0.05 ± 0.01  | 0.272<br>(0.868)        | 0.03 ± 0.01  | 0.133<br>(0.557)        | 0.04 ± 0.00  | <b>0.001</b><br>(0.034) |
|                                                               | 10h | 0.02 ± 0.01  |                         | 0.03 ± 0.02 |                         | 0.01 ± 0.01  |                         | 0.01 ± 0.01  |                         | 0.01 ± 0.01* |                         |
|                                                               | 24h | 0.02 ± 0.01  |                         | 0.03 ± 0.02 |                         | 0.02 ± 0.02  |                         | 0.00 ± 0.00  |                         | 0.01 ± 0.01* |                         |
| p_Bacteroidetes<br>f_Bacteroidaceae<br>g_Bacteroides          | 0h  | 18 ± 4.2     | <b>0.006</b><br>(0.201) | 15.1 ± 3.1  | 0.349<br>(0.985)        | 17.5 ± 3.2   | <b>0.016</b><br>(0.268) | 17.2 ± 4.8   | <b>0.031</b><br>(0.346) | 14 ± 2.3     | 0.423<br>(0.951)        |
|                                                               | 10h | 7.2 ± 3.8*   |                         | 12.5 ± 6    |                         | 2.3 ± 1.02*  |                         | 2.8 ± 1.1    |                         | 6.2 ± 4      |                         |
|                                                               | 24h | 3.6 ± 1.4*   |                         | 11.6 ± 3.8  |                         | 3 ± 1.46     |                         | 9.5 ± 3.6    |                         | 12.6 ± 8.9   |                         |
| p_Bacteroidetes<br>f_[Odoribacteraceae]<br>g_Odoribacter      | 0h  | 0.32 ± 0.09  | 0.063<br>(0.422)        | 0.37 ± 0.13 | 0.875<br>(0.985)        | 0.33 ± 0.12  | 0.095<br>(0.398)        | 0.30 ± 0.15  | 0.535<br>(0.985)        | 0.26 ± 0.08  | <b>0.016</b><br>(0.179) |
|                                                               | 10h | 0.14 ± 0.05  |                         | 0.33 ± 0.11 |                         | 0.05 ± 0.04  |                         | 0.10 ± 0.04  |                         | 0.19 ± 0.09* |                         |
|                                                               | 24h | 0.06 ± 0.02  |                         | 0.41 ± 0.24 |                         | 0.02 ± 0.02  |                         | 0.15 ± 0.13  |                         | 0.07 ± 0.04* |                         |
| p_Bacteroidetes<br>f_Rikenellaceae<br>g_unassigned            | 0h  | 2.8 ± 1.2    | 0.116<br>(0.518)        | 2.2 ± 0.88  | 0.125<br>(0.598)        | 2.1 ± 0.76   | <b>0.050</b><br>(0.279) | 2.3 ± 0.76   | <b>0.043</b><br>(0.288) | 2.4 ± 0.9    | 0.060<br>(0.287)        |
|                                                               | 10h | 0.86 ± 0.29  |                         | 1.4 ± 0.54  |                         | 0.6 ± 0.22   |                         | 0.48 ± 0.18  |                         | 0.97 ± 0.43  |                         |
|                                                               | 24h | 0.91 ± 0.45  |                         | 1.1 ± 0.26  |                         | 0.57 ± 0.28  |                         | 0.70 ± 0.46  |                         | 0.59 ± 0.3   |                         |
| p_Actinobacteria<br>f_Bifidobacteriaceae<br>g_Bifidobacterium | 0h  | 2.5 ± 0.28   | 0.569<br>(0.979)        | 2.5 ± 0.1   | 0.376<br>(0.985)        | 3.5 ± 0.1    | <b>0.049</b><br>(0.305) | 3.3 ± 0.61   | <b>0.016</b><br>(0.268) | 3.8 ± 0.86   | 0.069<br>(0.308)        |
|                                                               | 10h | 4.7 ± 2.4    |                         | 2.8 ± 0.21  |                         | 24.3 ± 8.7   |                         | 19.4 ± 4.2   |                         | 16.2 ± 2.1   |                         |
|                                                               | 24h | 6.3 ± 4.6    |                         | 2.6 ± 0.21  |                         | 14.9 ± 2.5*  |                         | 15.2 ± 2.6   |                         | 10.4 ± 3.5   |                         |
|                                                               | 0h  | 2 ± 0.2      |                         | 1.9 ± 0.14  |                         | 1.7 ± 0.24   |                         | 1.8 ± 0.07   |                         | 2.1 ± 0.14   |                         |

|                                                          |     |              |                         |             |                                  |             |                  |             |                         |              |                         |
|----------------------------------------------------------|-----|--------------|-------------------------|-------------|----------------------------------|-------------|------------------|-------------|-------------------------|--------------|-------------------------|
| p_Actinobacteria<br>f_Coriobacteriaceae<br>g_Collinsella | 10h | 8.6 ± 2.6    | <b>0.050</b><br>(0.394) | 3.2 ± 0.06* | <b>0.001</b><br>( <b>0.040</b> ) | 5.6 ± 1.8   | 0.097<br>(0.382) | 5.9 ± 1.5   | <b>0.050</b><br>(0.274) | 5.5 ± 1.4    | 0.052<br>(0.290)        |
|                                                          | 24h | 7 ± 1.6      |                         | 3.8 ± 0.17* |                                  | 4.7 ± 1.1   |                  | 5.2 ± 0.95  |                         | 8.4 ± 2      |                         |
| p_Actinobacteria<br>f_Coriobacteriaceae<br>g_unassigned  | 0h  | 0.62 ± 0.16  | 0.250<br>(0.985)        | 0.61 ± 0.18 | 0.849<br>(0.985)                 | 0.55 ± 0.09 | 0.693<br>(0.985) | 0.65 ± 0.17 | <b>0.042</b><br>(0.313) | 0.82 ± 0.36  | 0.352<br>(0.951)        |
|                                                          | 10h | 0.60 ± 0.18  |                         | 0.5 ± 0.09  |                                  | 0.50 ± 0.17 |                  | 0.38 ± 0.13 |                         | 0.45 ± 0.17  |                         |
|                                                          | 24h | 0.33 ± 0.02  |                         | 0.57 ± 0.11 |                                  | 0.44 ± 0.16 |                  | 0.31 ± 0.06 |                         | 0.44 ± 0.01  |                         |
| p_Proteobacteria<br>f_Alcaligenaceae<br>g_Sutterella     | 0h  | 1.1 ± 0.04   | 0.104<br>(0.498)        | 1 ± 0.14    | <b>0.035</b><br>(0.391)          | 1.2 ± 0.18  | 0.085<br>(0.380) | 1.4 ± 0.2   | 0.051<br>(0.285)        | 1.1 ± 0.2    | 0.165<br>(0.582)        |
|                                                          | 10h | 4.8 ± 1.9    |                         | 7.2 ± 2.6   |                                  | 6.3 ± 2.2   |                  | 6.4 ± 2.2   |                         | 8.9 ± 4.6    |                         |
|                                                          | 24h | 4.5 ± 1.4    |                         | 9.6 ± 2.6   |                                  | 5.9 ± 1.9   |                  | 6.1 ± 1.4   |                         | 5.2 ± 2.5    |                         |
| p_Proteobacteria<br>f_Brucellaceae<br>g_Ochrobactrum     | 0h  | 0.05 ± 0.02  | 0.626<br>(0.979)        | 0.06 ± 0.02 | 0.362<br>(0.985)                 | 0.06 ± 0.02 | 0.396<br>(0.985) | 0.09 ± 0.03 | <b>0.031</b><br>(0.297) | 0.09 ± 0.01  | <b>0.045</b><br>(0.335) |
|                                                          | 10h | 0.03 ± 0.02  |                         | 0.03 ± 0.02 |                                  | 0.04 ± 0.02 |                  | 0.03 ± 0.02 |                         | 0.03 ± 0.01* |                         |
|                                                          | 24h | 0.03 ± 0.02  |                         | 0.02 ± 0.01 |                                  | 0.03 ± 0.02 |                  | 0.02 ± 0.01 |                         | 0.03 ± 0.02  |                         |
| p_Proteobacteria<br>f_Desulfovibrionaceae<br>g_Bilophila | 0h  | 0.13 ± 0.02  | <b>0.050</b><br>(0.372) | 0.06 ± 0.01 | 0.102<br>(0.526)                 | 0.12 ± 0.05 | 0.074<br>(0.354) | 0.10 ± 0.01 | <b>0.031</b><br>(0.415) | 0.15 ± 0.00  | 0.284<br>(0.951)        |
|                                                          | 10h | 0.33 ± 0.03* |                         | 1.7 ± 0.65  |                                  | 0.17 ± 0.01 |                  | 0.24 ± 0.08 |                         | 0.26 ± 0.05  |                         |
|                                                          | 24h | 0.84 ± 0.25  |                         | 3.3 ± 1.4   |                                  | 0.74 ± 0.27 |                  | 1.5 ± 0.44  |                         | 1.5 ± 0.93   |                         |

Samples were analyzed at 0, 10 and 24 h. Results are expressed as relative abundance (%) and values are mean ± SEM of the three fermentations. <sup>a</sup>*p*=raw/unadjusted *p* values, *p*-FDR=corrected with false discovery rate method for 67 taxa. \* Significant differences (*p* < 0.05) from the 0 h time point within the same treatment. Brackets indicate suggested but not verified names. p: phylum; f: family; g: genus.

**Table S3.** Multiple Reaction Monitoring (MRM) conditions of precursor polyphenols and polyphenol microbial metabolites.

| Compound                                       | RT (min) | ESI mode | Precursor ion (m/z) | Quantifier Product ion (m/z) | Qualifier Product ion (m/z) |
|------------------------------------------------|----------|----------|---------------------|------------------------------|-----------------------------|
| <b><u>Precursor polyphenols</u></b>            |          |          |                     |                              |                             |
| <b>Flavan-3-ols</b>                            |          |          |                     |                              |                             |
| Catechin                                       | 2.80     | -        | 289                 | 203                          | 123                         |
| Epicatechin                                    | 3.32     | -        | 289                 | 203                          | 123                         |
| Procyanidin A2                                 | 4.62     | -        | 575                 | 285                          | 449                         |
| Procyanidin B1                                 | 2.40     | -        | 577                 | 289                          | 425                         |
| Procyanidin B2 + B4                            | 3.01     | -        | 577                 | 289                          | 425                         |
| <b>Hydroxycinnamates</b>                       |          |          |                     |                              |                             |
| Chlorogenic acid                               | 2.76     | -        | 353                 | 191                          |                             |
| Neochlorogenic acid                            | 2.18     | -        | 353                 | 191                          | 179                         |
| Cryptochlorogenic acid                         | 2.87     | -        | 353                 | 173                          | 179                         |
| <b>Flavonols</b>                               |          |          |                     |                              |                             |
| Quercetin                                      | 8.40     | +        | 303                 | 153                          | 229                         |
| Quercetin-3- <i>O</i> -glucoside               | 4.50     | +        | 465                 | 303                          | 229                         |
| quercetin-3- <i>O</i> -rhamnoside              | 5.55     | +        | 449                 | 303                          | 129                         |
| Kaempferol                                     | 8.45     | +        | 287                 | 153                          | 165                         |
| Isorhamnetin                                   | 8.67     | +        | 317                 | 153                          | 302                         |
| Laricitrin                                     | 7.46     | +        | 333                 | 318                          | 218                         |
| <b>Dihydrochalcones</b>                        |          |          |                     |                              |                             |
| Phloretin                                      | 8.23     | -        | 273                 | 167                          | 123                         |
| Phlorizin                                      | 6.22     | -        | 435                 | 273                          | 167                         |
| <b>Flavones</b>                                |          |          |                     |                              |                             |
| Luteolin                                       | 7.37     | +        | 287                 | 153                          | 135                         |
| <b>Other/benzoic acid derivatives</b>          |          |          |                     |                              |                             |
| Ellagic acid                                   | 4.38     | -        | 301                 | 145                          | 185                         |
| Vanillin                                       | 4.07     | +        | 153                 | 93                           | 125                         |
| Vanillic acid                                  | 3.23     | +        | 169                 | 93                           | 65                          |
|                                                |          |          |                     |                              |                             |
| <b><u>Polyphenol microbial metabolites</u></b> |          |          |                     |                              |                             |
| <b>Phenylacetic acid derivatives</b>           |          |          |                     |                              |                             |
| 3-Hydroxyphenylacetic acid                     | 3.40     | -        | 151                 | 65                           | 79                          |
| 3,4-Dihydroxyphenylacetic acid                 | 2.33     | +        | 169                 |                              | 77                          |
| 3,4-Dihydroxyphenylacetic acid                 | 2.33     | -        | 167                 | 95                           |                             |
| Homovanillic acid                              | 3.39     | +        | 183                 | 137                          | 122                         |
| <b>Phenylpropionic acid derivatives</b>        |          |          |                     |                              |                             |
| 3-(3-Hydroxyphenyl)propionic acid              | 4.28     | +        | 167                 | 121                          | 107                         |
| 3-(4-Hydroxyphenyl)propionic acid              | 3.81     | +        | 167                 | 107                          |                             |
| 3-(4-Hydroxyphenyl)propionic acid              | 3.81     | -        | 165                 |                              | 93                          |



|                                  |      |   |     |     |     |
|----------------------------------|------|---|-----|-----|-----|
| Hydroferulic acid                | 4.20 | - | 195 | 136 | 121 |
| <b>Benzoic acid Derivatives</b>  |      |   |     |     |     |
| Gallic acid                      | 1.39 | + | 171 | 109 | 81  |
| 4-Hydroxybenzoic acid            | 2.83 | + | 139 | 77  | 65  |
| Protocatechuic acid              | 2.10 | + | 155 | 93  | 65  |
| Pyrocatechol                     | 2.86 | - | 109 | 81  | 53  |
| <b>Cinnamic acid Derivatives</b> |      |   |     |     |     |
| Caffeic acid                     | 3.18 | + | 181 | 145 | 117 |
| p-Coumaric acid                  | 4.01 | + | 165 | 91  | 119 |
| trans-Ferulic acid               | 4.49 | + | 195 | 145 | 117 |
| trans-Isoferulic acid            | 4.80 | + | 195 | 145 | 117 |

**Table S4.** Changes in precursor polyphenols throughout 24-hour *in vitro* batch culture fermentations inoculated with human feces (n=3 healthy donors) and administrated with inulin, cellulose, Renetta Canada, Golden Delicious and Pink Lady as the substrates.

| Apple variety                         | 0h                         | 5h            | 10h           | 24h          | p     |
|---------------------------------------|----------------------------|---------------|---------------|--------------|-------|
| <b>Catechin (ng/ml)</b>               |                            |               |               |              |       |
| Renetta Canada                        | 127.8 ± 31.3 <sup>b</sup>  | 19.1 ± 11.9   | 9 ± 7.4*      | 3.7 ± 3.7*   | 0.005 |
| Golden Delicious                      | 7.1 ± 4.2 <sup>a</sup>     | 0.1 ± 0.05    | 0.9 ± 0.5     | 1.1 ± 1.1    | 0.169 |
| Pink Lady                             | 0.14 ± 0.07 <sup>a</sup>   | 1.3 ± 0.7     | 0.36 ± 0.36   | 0.29 ± 0.26  | 0.292 |
| <b>Epicatechin (ng/ml)</b>            |                            |               |               |              |       |
| Renetta Canada                        | 449.3 ± 32.4 <sup>b</sup>  | 27.6 ± 15.8*  | 8.1 ± 2.3*    | 4.9 ± 3.1*   | 0.000 |
| Golden Delicious                      | 55.7 ± 15.2 <sup>a</sup>   | 4.6 ± 1.6*    | 0.6 ± 0.6*    | 2.3 ± 2.3*   | 0.006 |
| Pink Lady                             | 6.3 ± 2.9 <sup>a</sup>     | 0.8 ± 0.8     | 1.3 ± 1.3     | 0.66 ± 0.66  | 0.119 |
| <b>Procyanidin A2 (ng/ml)</b>         |                            |               |               |              |       |
| Renetta Canada                        | 239.1 ± 45.1 <sup>b</sup>  | 58 ± 36.8     | 21 ± 17.9*    | 0.14 ± 0.14* | 0.003 |
| Golden Delicious                      | 96.3 ± 39.5 <sup>a</sup>   | 17.5 ± 8.5    | 3 ± 3         | 0.17 ± 0.17  | 0.030 |
| Pink Lady                             | 37.9 ± 7.8 <sup>a</sup>    | 16.3 ± 8.2*   | 3.2 ± 3.2*    | 0.98 ± 0.98* | 0.005 |
| <b>Procyanidin B1 (ng/ml)</b>         |                            |               |               |              |       |
| Renetta Canada                        | 82.3 ± 40.4 <sup>b</sup>   | 27.9 ± 25.9   | 1.5 ± 0.9     | 1.1 ± 0.6    | 0.088 |
| Golden Delicious                      | 2.3 ± 1.7 <sup>a</sup>     | 0 ± 0         | 2.4 ± 1.7     | 0 ± 0        | 0.224 |
| Pink Lady                             | 1.4 ± 0.3 <sup>a</sup>     | 0 ± 0         | 1.2 ± 1.2     | 0 ± 0        | 0.359 |
| <b>Procyanidin B2 B4 (ng/ml)</b>      |                            |               |               |              |       |
| Renetta Canada                        | 233.7 ± 140.8              | 22.1 ± 19.5   | 2.1 ± 0.6     | 0.56 ± 0.44  | 0.132 |
| Golden Delicious                      | 13.4 ± 10                  | 0.13 ± 0.13   | 0 ± 0         | 0 ± 0        | 0.250 |
| Pink Lady                             | 0.89 ± 0.41                | 0 ± 0         | 2.4 ± 2.1     | 0 ± 0        | 0.376 |
| <b>Chlorogenic acid (ng/ml)</b>       |                            |               |               |              |       |
| Renetta Canada                        | 215.4 ± 114.6              | 0.37 ± 0.2    | 0 ± 0         | 0 ± 0        | 0.088 |
| Golden Delicious                      | 1.3 ± 0.7                  | 0.03 ± 0.03   | 0.15 ± 0.15   | 0.13 ± 0.13  | 0.160 |
| Pink Lady                             | 0.56 ± 0.31                | 0.12 ± 0.08   | 0 ± 0         | 0.15 ± 0.25  | 0.244 |
| <b>Neochlorogenic acid (ng/ml)</b>    |                            |               |               |              |       |
| Renetta Canada                        | 65 ± 31.4                  | 17.1 ± 14.4   | 4.2 ± 2.4     | 1.4 ± 1.4    | 0.061 |
| Golden Delicious                      | 10 ± 1.4                   | 0.8 ± 0.6*    | 0.56 ± 0.56*  | 0 ± 0*       | 0.000 |
| Pink Lady                             | 6.1 ± 2.6                  | 1.1 ± 0.2     | 0.32 ± 0.18   | 0 ± 0        | 0.053 |
| <b>Cryptochlorogenic acid (ng/ml)</b> |                            |               |               |              |       |
| Renetta Canada                        | 21.2 ± 10.8                | 0.08 ± 0.08   | 0 ± 0         | 0.09 ± 0.09  | 0.074 |
| Golden Delicious                      | 1.9 ± 0.7                  | 0 ± 0         | 0.31 ± 0.31   | 0.00 ± 0.00  | 0.033 |
| Pink Lady                             | 0.6 ± 0.26                 | 0.09 ± 0.09   | 0 ± 0         | 0.52 ± 0.41  | 0.377 |
| <b>Quercetin (ng/ml)</b>              |                            |               |               |              |       |
| Renetta Canada                        | 168.9 ± 34.3               | 125.9 ± 124.8 | 64.8 ± 64.6   | 33.7 ± 33.3  | 0.273 |
| Golden Delicious                      | 358.1 ± 53.4               | 526.9 ± 522.4 | 430.5 ± 429.2 | 4.9 ± 4.9    | 0.573 |
| Pink Lady                             | 408.8 ± 102.1              | 449.2 ± 444.9 | 208.6 ± 207.1 | 2.2 ± 2      | 0.527 |
| <b>Quercetin-3-Glc (ng/ml)</b>        |                            |               |               |              |       |
| Renetta Canada                        | 1.2 ± 0.3 <sup>a</sup>     | 0.0 ± 0.0*    | 0 ± 0*        | 0.3 ± 0.16   | 0.006 |
| Golden Delicious                      | 386.1 ± 48.7 <sup>c</sup>  | 0.73 ± 0.4*   | 0 ± 0*        | 0.27 ± 0.27* | 0.000 |
| Pink Lady                             | 165.3 ± 20.6 <sup>b</sup>  | 0.2 ± 0.2*    | 0.22 ± 0.22*  | 0.2 ± 0.2*   | 0.000 |
| <b>Quercetin-3-Rha (ng/ml)</b>        |                            |               |               |              |       |
| Renetta Canada                        | 69.2 ± 14.7 <sup>a</sup>   | 0.08 ± 0.08*  | 0.03 ± 0.03*  | 0 ± 0*       | 0.001 |
| Golden Delicious                      | 218.6 ± 34.6 <sup>b</sup>  | 0.31 ± 0.16*  | 0.03 ± 0.03*  | 0.03 ± 0.03* | 0.000 |
| Pink Lady                             | 164.5 ± 40.7 <sup>ab</sup> | 0.50 ± 0.37*  | 0.07 ± 0.07*  | 0.00 ± 0.00* | 0.003 |
| <b>Kaempferol (ng/ml)</b>             |                            |               |               |              |       |
| Renetta Canada                        | 22.8 ± 4.5                 | 5 ± 4.2*      | 4.2 ± 4*      | 3.7 ± 3.3*   | 0.000 |
| Golden Delicious                      | 11.7 ± 2.1                 | 6.5 ± 6.3     | 2.2 ± 2.2     | 0.1 ± 0.1    | 0.095 |
| Pink Lady                             | 11.3 ± 1.5                 | 7.3 ± 5.7     | 1.3 ± 0.7     | 0.23 ± 0.15  | 0.095 |
| <b>Isorhamnetin (ng/ml)</b>           |                            |               |               |              |       |
| Renetta Canada                        | 2.6 ± 0.4                  | 0.85 ± 0.6*   | 0.6 ± 0.5*    | 0.69 ± 0.63* | 0.000 |

|                              |                            |               |             |             |       |
|------------------------------|----------------------------|---------------|-------------|-------------|-------|
| <b>Golden Delicious</b>      | 4.2 ± 0.9                  | 2.1 ± 2.1     | 1.3 ± 1     | 0 ± 0       | 0.077 |
| <b>Pink Lady</b>             | 3.9 ± 0.9                  | 1.9 ± 1.9     | 0.4 ± 0.1   | 0 ± 0       | 0.146 |
| <b>Laricitrin (ng/ml)</b>    |                            |               |             |             |       |
| <b>Renetta Canada</b>        | 6.7 ± 1.3                  | 8.4 ± 7.2     | 5.9 ± 5.5   | 3.3 ± 2.9   | 0.684 |
| <b>Golden Delicious</b>      | 22.1 ± 4.5                 | 24.8 ± 21.2   | 22.8 ± 22.1 | 6 ± 5.8     | 0.614 |
| <b>Pink Lady</b>             | 18.6 ± 5.9                 | 20 ± 16.4     | 8.1 ± 7.3   | 5.9 ± 5.2   | 0.555 |
| <b>Phloretin (ng/ml)</b>     |                            |               |             |             |       |
| <b>Renetta Canada</b>        | 120.8 ± 23 <sup>b</sup>    | 614.3 ± 544.7 | 103.2 ± 102 | 0.48 ± 0.48 | 0.404 |
| <b>Golden Delicious</b>      | 28 ± 4.2 <sup>a</sup>      | 106.3 ± 101.6 | 43.6 ± 43.6 | 0 ± 0       | 0.492 |
| <b>Pink Lady</b>             | 4.5 ± 1 <sup>a</sup>       | 22.8 ± 21     | 10.9 ± 10.9 | 0.03 ± 0.03 | 0.456 |
| <b>Phlorizin (ng/ml)</b>     |                            |               |             |             |       |
| <b>Renetta Canada</b>        | 592.8 ± 233.2 <sup>b</sup> | 0.64 ± 0.53   | 0.07 ± 0.04 | 0.02 ± 0.02 | 0.026 |
| <b>Golden Delicious</b>      | 78.4 ± 29.1 <sup>a</sup>   | 0.03 ± 0.03   | 0 ± 0       | 0 ± 0       | 0.020 |
| <b>Pink Lady</b>             | 3.2 ± 1 <sup>a</sup>       | 3.55 ± 3.51   | 0 ± 0       | 0 ± 0       | 0.459 |
| <b>Luteolin (ng/ml)</b>      |                            |               |             |             |       |
| <b>Renetta Canada</b>        | 1.2 ± 0.17                 | 0.38 ± 0.33   | 0.47 ± 0.43 | 0.6 ± 0.6   | 0.292 |
| <b>Golden Delicious</b>      | 0.65 ± 0.18                | 0.73 ± 0.73   | 0.38 ± 0.23 | 0.22 ± 0.22 | 0.725 |
| <b>Pink Lady</b>             | 1.10 ± 0.45                | 0.79 ± 0.66   | 0.27 ± 0.14 | 0.09 ± 0.09 | 0.453 |
| <b>Ellagic acid (ng/ml)</b>  |                            |               |             |             |       |
| <b>Renetta Canada</b>        | 21.5 ± 3                   | 40 ± 16.6     | 20.6 ± 8    | 18.6 ± 8    | 0.461 |
| <b>Golden Delicious</b>      | 22.4 ± 2.1                 | 19.8 ± 6.85   | 12.4 ± 6.2  | 20.9 ± 3.6  | 0.556 |
| <b>Pink Lady</b>             | 21.1 ± 3.6                 | 34.1 ± 14.1   | 22.7 ± 11.7 | 31.1 ± 9.6  | 0.514 |
| <b>Vanillin (ng/ml)</b>      |                            |               |             |             |       |
| <b>Renetta Canada</b>        | 6.8 ± 0.1 <sup>b</sup>     | 3.5 ± 1.4     | 2.4 ± 0.9*  | 2 ± 0.24*   | 0.008 |
| <b>Golden Delicious</b>      | 5.2 ± 0.5 <sup>a</sup>     | 2.5 ± 0.8     | 1.9 ± 0.8*  | 1.3 ± 0.27* | 0.004 |
| <b>Pink Lady</b>             | 4.8 ± 0.5 <sup>a</sup>     | 3.4 ± 1.3     | 4.7 ± 2.1   | 2.2 ± 0.47  | 0.496 |
| <b>Vanillic acid (ng/ml)</b> |                            |               |             |             |       |
| <b>Renetta Canada</b>        | 4.7 ± 0.9                  | 5.5 ± 2.1     | 3.1 ± 1.8   | 2.3 ± 1.2   | 0.397 |
| <b>Golden Delicious</b>      | 3.4 ± 0.5                  | 2.3 ± 1.4     | 0.79 ± 0.58 | 1.8 ± 0.95  | 0.066 |
| <b>Pink Lady</b>             | 4.2 ± 1.1                  | 3.9 ± 1.9     | 1.9 ± 1.1   | 1.9 ± 0.90  | 0.323 |

Samples were collected at 0, 5, 10 and 24 h. Results are expressed as ng/ml of batch culture medium and values are mean ± SEM of the three fermentations. Significant differences ( $p < 0.05$ ) between treatments at the same time point are indicated with different letters. \* Significant differences ( $p < 0.05$ ) from the 0 h time point within the same treatment.
